# Supplementary material
Source: publisher figshare collection journal article supplement (https://frontiersin.figshare.com/ndownloader/files/17890037)
Supplement: Supplementary file [file 17890037]

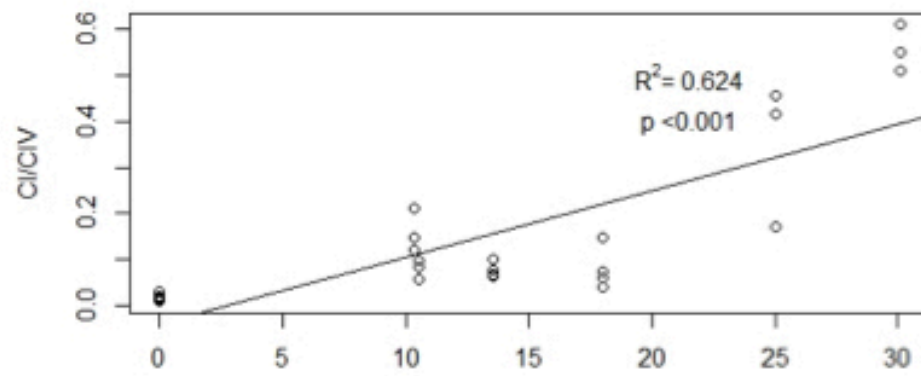

a)

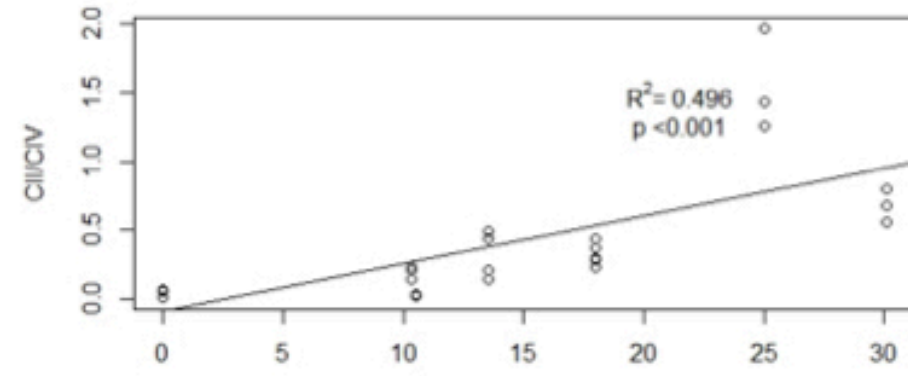

b)

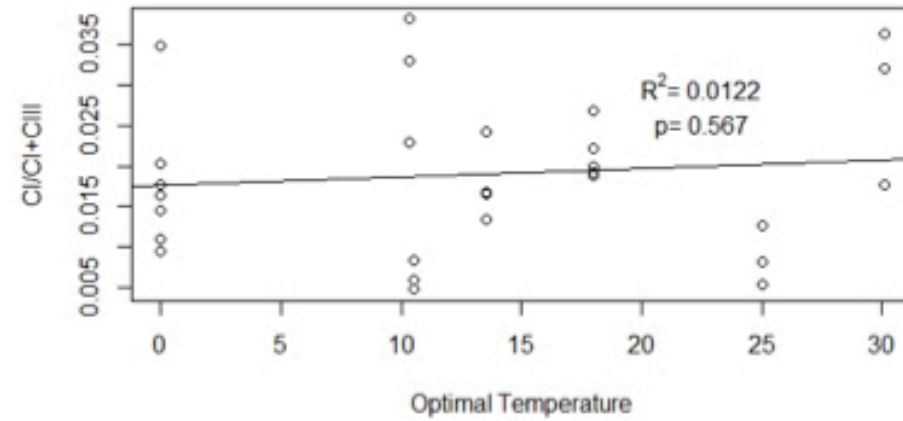

c)

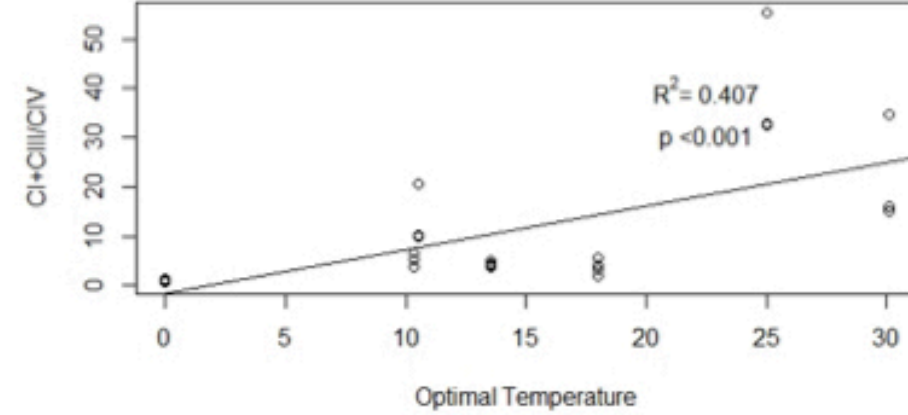

d)

Figures S3. Correlations of relative activities of enzymes of the Electron Transport System, normalized by either CI+CIII or CIV activities, with estimated optimal temperatures of species (°C). a) CI/CIV, b) CII/CIV, c) CI/(CI+CIII), d) CI+CIII/CIV.
